# Supplementary material for: High‐risk cytogenetic abnormalities in multiple myeloma: PETHEMA‐GEM experience
Source: PubMed Central journal article supplement — Hemasphere. 2024 Dec 10;8(12):e70031. doi: 10.1002/hem3.70031 (PMC11632121; doi:10.1002/hem3.70031), 2024-12-10
Supplement: HEM3-8-e70031-s001.pdf [file HEM3-8-e70031-s001.pdf]

## Supplementary material

|                                                                                                                                                                                          |   |
|------------------------------------------------------------------------------------------------------------------------------------------------------------------------------------------|---|
| Table S1. Number of newly diagnosed MM patients included in the four upfront trials conducted by the Spanish Myeloma Group GEM (GEM05mas65, GEM05menores65, GEM2010, GEM2012) .....      | 2 |
| Table S2. Responses achieved after induction by different cytogenetic groups of patients included in the Spanish Myeloma trials (GEM05mas65, GEM05menores65, GEM2010, GEM2012) .....     | 3 |
| Table S3: Comparison of basal characteristics of MM patients with and without t(4;14) included in the Spanish Myeloma trials (GEM05MAS65, GEM05MENOS65, GEM2010, GEM2012) .....          | 4 |
| Table S4. Comparison of basal characteristics of MM patients with and without t(14;16) included in the Spanish Myeloma trials (GEM05MAS65, GEM05MENOS65, GEM2010, GEM2012) .....         | 5 |
| Table S5. Comparison of basal characteristics of MM patients with and without del(17p) included in the Spanish Myeloma trials (GEM05MAS65, GEM05MENOS65, GEM2010, GEM2012). .....        | 6 |
| Table S6. PFS and OS by different cut-off points based on the percentage of cells harboring del(17p) in the Spanish Myeloma trials (GEM05mas65, GEM05menores65, GEM2010, GEM2012). ..... | 7 |

Table S1. Number of newly diagnosed MM patients included in the four upfront trials conducted by the Spanish Myeloma Group GEM (GEM05mas65, GEM05menores65, GEM2010, GEM2012)

| SPANISH MYELOMA TRIALS | Frequency | Percent (%) |
|------------------------|-----------|-------------|
| GEM05MAS65             | 257       | 19,7        |
| GEM2010                | 236       | 18,1        |
| GEM05MENOS65           | 354       | 27,1        |
| GEM2012                | 457       | 35,0        |
| Total                  | 1304      | 100,0       |

Table S2. Responses achieved after induction by different cytogenetic groups of patients included in the Spanish Myeloma trials (GEM05mas65, GEM05menores65, GEM2010, GEM2012)

|                 |                 | Response after induction |            |         |
|-----------------|-----------------|--------------------------|------------|---------|
|                 |                 | CR                       | <CR        | p value |
| <b>del(17p)</b> | <b>positive</b> | 19 (22.9)                | 64 (77.1)  | NS      |
|                 | <b>negative</b> | 321 (30.9)               | 718 (69.1) |         |
| <b>t(4;14)</b>  | <b>positive</b> | 45 (32.6)                | 93 (67.4)  | NS      |
|                 | <b>negative</b> | 293 (29.6)               | 698 (70.4) |         |
| <b>t(14;16)</b> | <b>positive</b> | 9 (29.0)                 | 22 (71.0)  | NS      |
|                 | <b>negative</b> | 326 (30.0)               | 759 (70.0) |         |
| <b>gain(1q)</b> | <b>positive</b> | 129 (34.8)               | 242 (65.2) | 0.07    |
|                 | <b>negative</b> | 145 (29.0)               | 355 (71.0) |         |
| <b>del(1p)</b>  | <b>positive</b> | 25 (35.7)                | 45 (64.3)  | NS      |
|                 | <b>negative</b> | 246 (30.9)               | 549 (69.1) |         |

CR: complete response; <CR: less than complete response; NS: not statistically significant.

Table S3: Comparison of basal characteristics of MM patients with and without t(4;14) included in the Spanish Myeloma trials (GEM05MAS65, GEM05MENOS65, GEM2010, GEM2012)

| <b>Basal Characteristics</b>     | <b>t(4;14)<br/>(n=142)</b> | <b>Non t(4;14)<br/>(n=1023)</b> | <b>P value</b> |
|----------------------------------|----------------------------|---------------------------------|----------------|
| Gender                           |                            |                                 |                |
| Male, No. (%)                    | 69 (48.6)                  | 542 (53.0)                      | NS             |
| Female, No. (%)                  | 73 (51.4)                  | 481 (47.0)                      |                |
| Light chain MM, No. (%):         | 11 (7.7)                   | 141 (13.9)                      | 0.04           |
| Ig G, IG A or Ig D MM, No. (%)   | 131 (92.3)                 | 873 (86.1)                      |                |
| Light chain subtype:             |                            |                                 |                |
| kappa, No. (%)                   | 92 (64.8)                  | 630 (62.1)                      | NS             |
| lambda, No. (%)                  | 50 (35.2)                  | 384 (37.9)                      |                |
| Serum M-protein:                 |                            |                                 |                |
| < 1g/dL, No. (%)                 | 13 (9.2)                   | 177 (17.5)                      | 0.01           |
| ≥ 1 g/dL, No. (%)                | 129 (90.8)                 | 835 (82.5)                      |                |
| Serum M-protein:                 |                            |                                 |                |
| ≥ 3 g/dL, No. (%)                | 95 (66.9)                  | 552 (54.7)                      | 0.006          |
| < 3 g/dL, No. (%)                | 47 (33.1)                  | 457 (45.3)                      |                |
| BM PC by morphology:             |                            |                                 |                |
| ≥ 60%                            | 32 (23.0)                  | 209 (21.7)                      | NS             |
| 10-59%                           | 107 (77.0)                 | 756 (78.3)                      |                |
| Hypercalcemia (>11g/dL), No. (%) | 14 (9.9)                   | 84 (8.3)                        | NS             |
| Creatinine:                      |                            |                                 |                |
| ≥ 1.5 g/dL, No. (%)              | 10 (7.0)                   | 109 (10.7)                      | NS             |
| < 1.5 g/dL, No. (%)              | 132 (93.0)                 | 909 (89.3)                      |                |
| Hemoglobin:                      |                            |                                 |                |
| ≤ 10 g/dL, No. (%)               | 67 (47.2)                  | 369 (36.2)                      | 0.01           |
| > 10 g/dL, No. (%)               | 75 (52.8)                  | 650 (63.8)                      |                |
| ISS stage, No. (%):              |                            |                                 |                |
| I                                | 35 (24.8)                  | 346 (34.2)                      | NS             |
| II                               | 68 (48.2)                  | 418 (41.3)                      |                |
| III                              | 38 (27.0)                  | 248 (24.5)                      |                |
| High LDH, No. (%)                | 25 (17.7)                  | 151 (14.8)                      | NS             |

Table S4. Comparison of basal characteristics of MM patients with and without t(14;16) included in the Spanish Myeloma trials (GEM05MAS65, GEM05MENOS65, GEM2010, GEM2012)

| <b>Basal Characteristics</b>                                  | <b>t (14;16)<br/>(n=31)</b>        | <b>Absence of t (14;16)<br/>(n=1119)</b> | <b>P value</b> |
|---------------------------------------------------------------|------------------------------------|------------------------------------------|----------------|
| Male/ female, No. (%)                                         | 11 (35.5) / 20 (64.5)              | 592 (52.9) / 527 (47.1)                  | 0.06           |
| Light chain MM, No. (%):<br>Ig G, IG A or Ig D MM, No.<br>(%) | 4 (12.9)<br>27 (87.1)              | 144 (13.0)<br>967 (87.0)                 | NS             |
| Light chain subtype:<br>kappa, No. (%)<br>lambda, No. (%)     | 17 (54.8)<br>14 (45.2)             | 696 (62.6)<br>415 (37.4)                 | NS             |
| Serum M-protein:<br>< 1g/dL, No. (%)<br>≥ 1 g/dL, No. (%)     | 6 (20.0)<br>24 (80.0)              | 179 (16.1)<br>930 (83.9)                 | NS             |
| BM PC by morphology:<br>≥ 60%<br>10-59%                       | 9 (30.0)<br>21 (70.0)              | 230 (21.7)<br>829 (78.3)                 | NS             |
| Hypercalcemia (11g/dL), No.<br>(%)                            | 1 (3.3)                            | 96 (8.6)                                 | NS             |
| Creatinine:<br>< 1.5 g/dL, No. (%)<br>≥ 1.5 g/dL, No. (%)     | 26 (86.7)<br>4 (13.3)              | 1002 (89.9)<br>113 (10.1)                | NS             |
| Hemoglobin:<br>≤ 10 g/dL, No. (%)<br>> 10 g/dL, No. (%)       | 12 (40.0)<br>18 (60.0)             | 419 (37.5)<br>697 (62.5)                 | NS             |
| ISS stage, No. (%):<br>I<br>II<br>III                         | 7 (23.3)<br>10 (33.3)<br>13 (43.3) | 369 (33.3)<br>472 (42.6)<br>267 (24.1)   | 0.05           |
| High LDH, No. (%)                                             | 4 (12.9)                           | 171 (15.4)                               | NS             |

MM: multiple myeloma; yrs: years-old; No.: number of patients; BM PC: bone marrow plasma cells; ISS: International Staging System; LDH: lactate dehydrogenase

Table S5. Comparison of basal characteristics of MM patients with and without del(17p) included in the Spanish Myeloma trials (GEM05MAS65, GEM05MENOS65, GEM2010, GEM2012).

| <b>Basal Characteristics</b>    | <b>del(17p)<br/>(No=89)</b> | <b>Absence of del(17p)<br/>(No=1059)</b> | <b>P value</b> |
|---------------------------------|-----------------------------|------------------------------------------|----------------|
| Male/ female, No. (%)           | 40 (44.9) / 49 (55.1)       | 568 (53.2) / 500 (46.8)                  | NS             |
| Ig G, IG A or Ig D MM, no. (%)  | 69 (77.5)                   | 927 (87.5)                               | 0.01           |
| Light chain MM, no. (%):        | 20 (22.5)                   | 132 (12.5)                               |                |
| Light chain subtype:            |                             |                                          | NS             |
| Kappa, No. (%)                  | 58 (65.2)                   | 656 (61.9)                               |                |
| Lambda, No. (%)                 | 31 (34.8)                   | 403 (38.1)                               |                |
| Serum M-protein:                |                             |                                          | 0.02           |
| < 1g/dL, No. (%)                | 23 (25.8)                   | 168 (15.9)                               |                |
| ≥ 1 g/dL, No. (%)               | 66 (74.2)                   | 889 (84.1)                               |                |
| BM PC by morphology:            |                             |                                          | 0.04           |
| ≥ 60%                           | 25 (30.5)                   | 211 (20.8)                               |                |
| 10-59%                          | 57 (69.5)                   | 804 (79.2)                               |                |
| Hypercalcemia (11g/dL), No. (%) | 12 (13.5)                   | 86 (8.1)                                 | 0.08           |
| Creatinine:                     |                             |                                          | NS             |
| < 1.5 g/dL, No. (%)             | 77 (86.5)                   | 958 (90.1)                               |                |
| ≥ 1.5 g/dL, No. (%)             | 12 (13.5)                   | 105 (9.9)                                |                |
| Hemoglobin:                     |                             |                                          | NS             |
| ≤ 10 g/dL, No. (%)              | 38 (42.7)                   | 392 (36.8)                               |                |
| > 10 g/dL, No. (%)              | 51 (57.3)                   | 672 (63.2)                               |                |
| ISS stage, No. (%):             |                             |                                          | 0.03           |
| I                               | 19 (22.1)                   | 365 (34.5)                               |                |
| II                              | 38 (44.2)                   | 442 (41.7)                               |                |
| III                             | 29 (33.7)                   | 252 (23.8)                               |                |
| High LDH, No. (%)               | 27 (30.3)                   | 146 (13.7)                               | <0.001         |

MM: multiple myeloma; yrs: years-old; No.: number of patients; BM PC: bone marrow plasma cells; ISS: International Staging System; LDH: lactate dehydrogenase

Table S6. PFS and OS by different cut-off points based on the percentage of cells harboring del(17p) in the Spanish Myeloma trials (GEM05mas65, GEM05menores65, GEM2010, GEM2012).

| Cut off for percentage of cells with del17p |                  | No. of patients with the chr abnormality | % of patients studied with the chr abnormality | Median PFS (months) | HR for PFS (CI 95%)* | Median OS (months) | HR for OS (CI 95%) |
|---------------------------------------------|------------------|------------------------------------------|------------------------------------------------|---------------------|----------------------|--------------------|--------------------|
| ≥20%                                        | Negative (0-19%) | 1043                                     | 92.3                                           | 46.0                | 1.9 (1.5-2.4)        | NR                 | 2.5 (1.9-3.3)      |
|                                             | ≥20%             | 89                                       | 7.7                                            | 23.9                |                      | 37.0               |                    |
| ≥30%                                        | Negative (0-29%) | 1062                                     | 93.8                                           | 45.4                | 1.9 (1.4-2.5)        | NR                 | 2.4 (1.8-3.3)      |
|                                             | ≥30%             | 70                                       | 6.2                                            | 22.0                |                      | 38.1               |                    |
| ≥40%                                        | Negative (0-39%) | 1072                                     | 94.7                                           | 45.4                | 2.0 (1.5-2.7)        | NR                 | 2.6 (1.9-3.6)      |
|                                             | ≥40%             | 60                                       | 5.3                                            | 21.0                |                      | 32.5               |                    |
| ≥50%                                        | Negative (0-49%) | 1078                                     | 95.2                                           | 45.3                | 2.0 (1.5-2.7)        | NR                 | 2.6 (1.8-3.6)      |
|                                             | ≥50%             | 54                                       | 4.8                                            | 20.2                |                      | 32.5               |                    |
| ≥60%                                        | Negative (0-59%) | 1091                                     | 96.4                                           | 45.0                | 2.0 (1.4-2.9)        | NR                 | 2.3 (1.5-3.4)      |
|                                             | ≥60%             | 41                                       | 3.6                                            | 21.0                |                      | 38.1               |                    |
| ≥70%                                        | Negative (0-69%) | 1098                                     | 97                                             | 44.7                | 2.0 (1.4-2.9)        | NR                 | 2.3 (1.5-3.5)      |
|                                             | ≥70%             | 34                                       | 3.0                                            | 18.8                |                      | 38.1               |                    |
| ≥80%                                        | Negative (0-79%) | 1110                                     | 98.1                                           | 44.3                | 2.3 (1.5-3.7)        | NR                 | 2.2 (1.3-3.7)      |
|                                             | ≥80%             | 22                                       | 1.9                                            | 13.8                |                      | 45.6               |                    |
| ≥90%                                        | Negative (0-89%) | 1119                                     | 98.9                                           | 44.3                | 3.6 (2.1-6.4)        | NR                 | 2.8 (1.5-5.4)      |
|                                             | ≥90%             | 13                                       | 1.1                                            | 8.4                 |                      | 31.2               |                    |

\*All differences are statistically significant (p-value < 0.05). Comparison are made between patients with presence of del(17p) and negative patients.  
NR: Not reached.
